# Supplementary material for: Ionic group-mediated crosslinked polyimide membranes for enhanced CO2 separation
Source: Royal Society of Chemistry journal article supplement (doi:10.1039/c5ra13081f), 2015-01-01

***Supporting Information for***

**Ionic Group-mediated Crosslinked Polyimide Membranes for  
Enhanced CO<sub>2</sub> Separation**

Irshad Kammakakam,<sup>a</sup> SangYong Nam,<sup>b</sup> and Tae-Hyun Kim<sup>\*,a</sup>

*<sup>a</sup>Organic Material Synthesis Laboratory, Department of Chemistry, Incheon National University, 119 Academy-ro, Songdo-dong, Yeonsu-gu, Incheon 406-772, Korea. Fax: +82-32-835-0762; E-mail: tkim@inu.ac.kr\**

*<sup>b</sup>Department of Materials Engineering and Convergence Technology, Engineering Research Institute, Gyeongsang National University, Jinju, 660-701, Republic of Korea*

**Fig. S1**  $^1\text{H}$  NMR spectrum of the 1,4-di(1H-imidazol-1-yl)butane (bisimidazole)

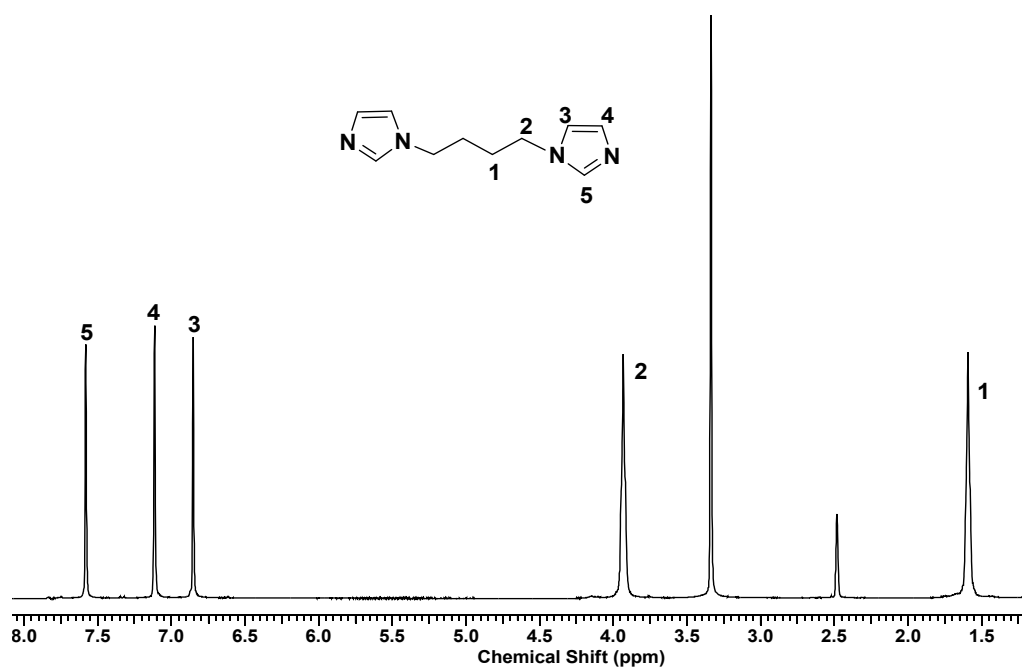

**Fig. S2** Stress-strain behavior of the pristine and crosslinked PI membranes

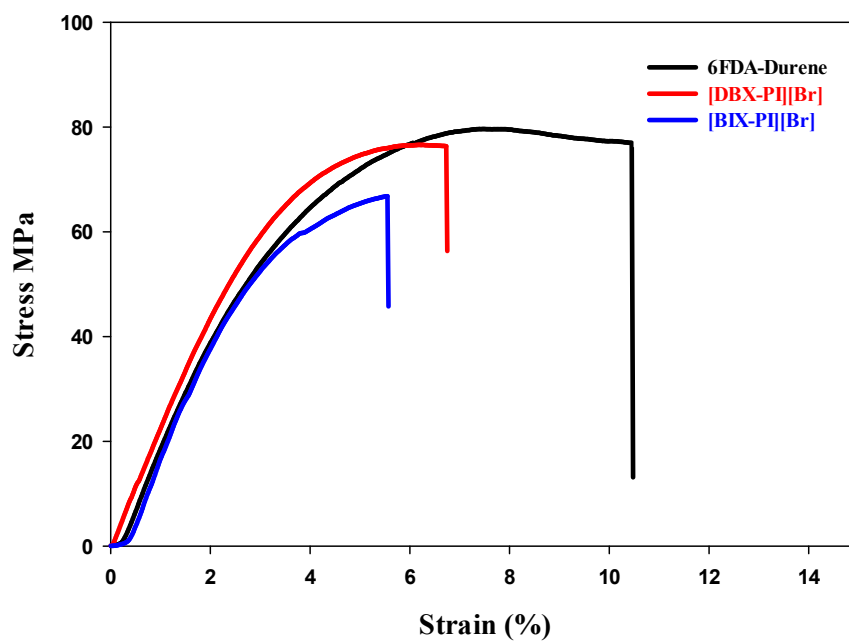

Supplement: c5ra13081f1.pdf [file c5ra13081f1.pdf]
